# Supplementary material for: Reciprocal Regulation of MAGED2 and HIF-1α Augments Their Expression under Hypoxia: Role of cAMP and PKA Type II
Source: MDPI journal article supplement (doi:10.3390/cells11213424), 2022-10-29
Supplement: s1 [file s1]

# Supplementary figures

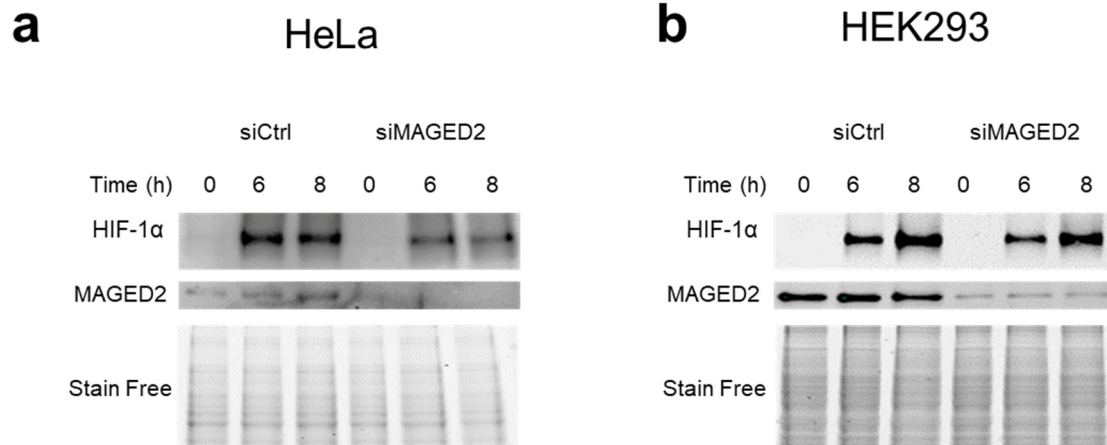

**Figure S1. MAGED2 promotes hypoxic HIF-1 $\alpha$  protein expression in HeLa and HEK293 cells:** HeLa (a) and HEK293 (b) cells were transfected with control (siCtrl), MAGED2 (siMAGED2). Briefly, 24 - 48 h post-transfection, cells were exposed to physical hypoxia. Cells were exposed to physical hypoxia (1% O<sub>2</sub>, 5% CO<sub>2</sub>, 94% N<sub>2</sub>) for the specified times. Total cell lysates were separated by SDS-PAGE and probed with an-ti-HIF-1 $\alpha$  and MAGED2 antibodies.

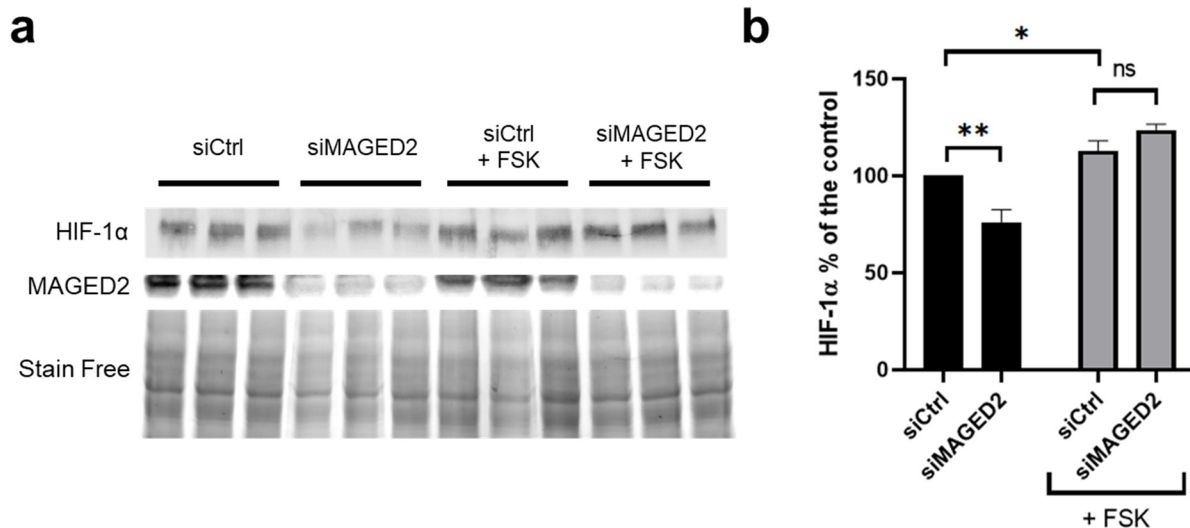

**Figure S2. Forskolin reverses the effect of MAGED2 knock-down on hypoxic HIF-1 $\alpha$  induction in HEK293 cells:** (a) HEK293 cells were transfected with control, or MAGED2 (M) siRNA cells were treated with chemical hypoxia (300 $\mu$ M CoCl<sub>2</sub>) with 10 $\mu$ M forskolin (FSK) for 14 - 16 h. Total cell lysates were separated by SDS-PAGE and probed with anti-HIF-1 $\alpha$  and MAGED2 antibodies. (b) Densitometric analysis of HIF-1 $\alpha$  immunoblot is presented in (a). Statistical significance was determined by unpaired two-sided Student's t-tests (b). Bar graphs show mean  $\pm$  SEM. \* $P \leq 0.05$  and \*\*  $P \leq 0.01$ .

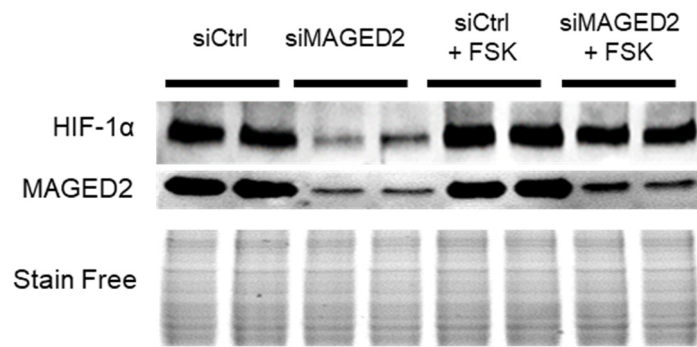

**Figure S3. Forskolin reverses the effect of MAGED2 knockdown on hypoxic HIF-1 $\alpha$  induction.** HeLa cells were transfected with control (siCtrl) or MAGED2 (siMAGED2) siRNA. Cells were exposed to physical hypoxia and with 10 $\mu$ M forskolin (FSK) for 14 - 16 h. Total cell lysates were separated by SDS-PAGE and probed with anti-HIF-1 $\alpha$  and MAGED2 antibodies.
